# Supplementary material
Source: PubMed Central journal article supplement (PMC3660456)
Supplement: NIHMS458998-supplement-01.pdf [file NIHMS458998-supplement-01.pdf]

## Supplementary Material

### Long Lived NMR Signal in Bone

by Boyang Zhang, Jae-Seung Lee, Anatoly Khitritin, and Alexej Jerschow

### Supplementary Figures

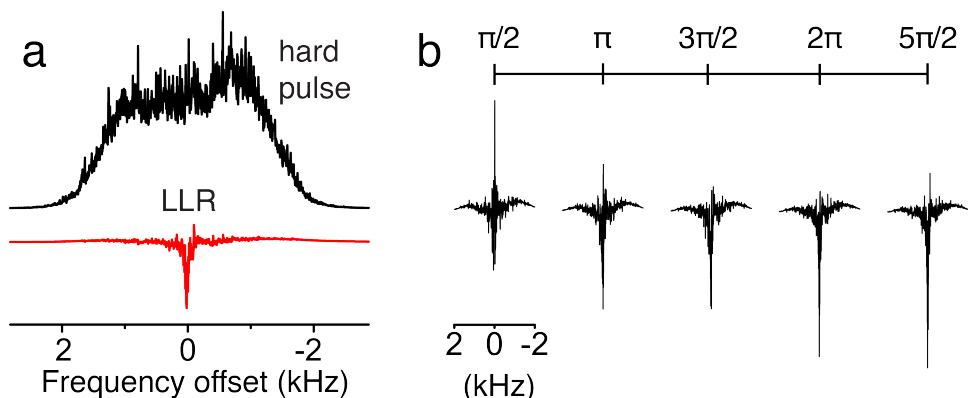

**Fig. S1.** Simulated spectra of long-lived signal excitation in 10 dipolar-coupled spins. **(a)** Comparison between a conventional spectrum with a  $\pi/2$  excitation pulse of 25 kHz amplitude (black) and a LLR spectrum (red) using a nominal  $2\pi$  pulse with 50 Hz power. **(b)** Simulated LLR spectra vs. the flip angle of the excitation pulse (at 50 Hz pulse power). For the simulation a system of 10 dipolar-coupled spins  $\frac{1}{2}$  with random dipolar couplings (in the range spanning -750 Hz  $\sim$  +900 Hz) and random chemical shifts (spanning -400 Hz  $\sim$  +460 Hz) was chosen to mimic a homogeneously broadened system with a continuous spectrum, while avoiding any accidental symmetries. After a rectangular pulse was applied to the thermal equilibrium state, a 2048-point free induction decay was numerically calculated, multiplied by a decaying exponential with decay constant 10 Hz, and Fourier transformed to produce the corresponding spectrum.

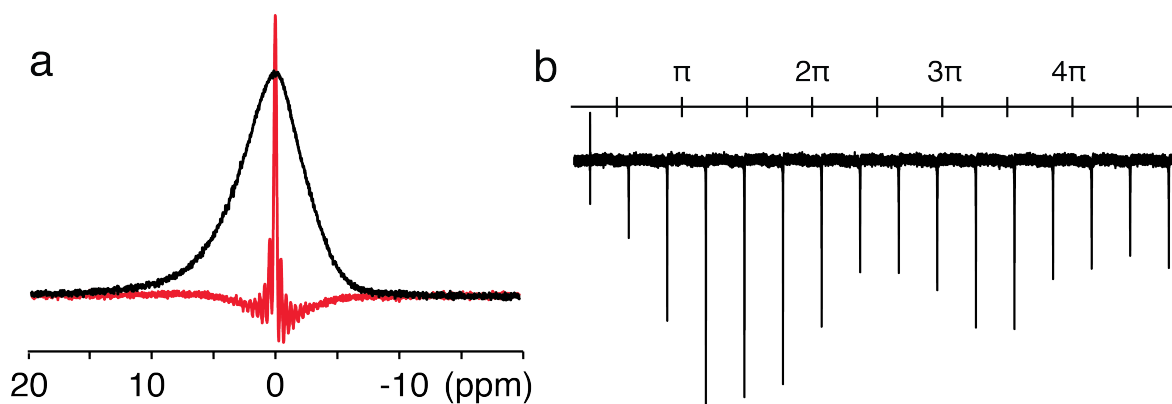

**Fig. S2.** Conventional and long-lived response  $^1\text{H}$  spectra of a dry collagen sample. **(a)** Hard-pulse excitation (black) and LLRE spectra with a pulse power of 40 Hz (red). **(b)** LLR signals were excited with pulses with flip angles ranging from  $\sim\pi/6$  to  $5\pi$  with a pulse power of 40 Hz.

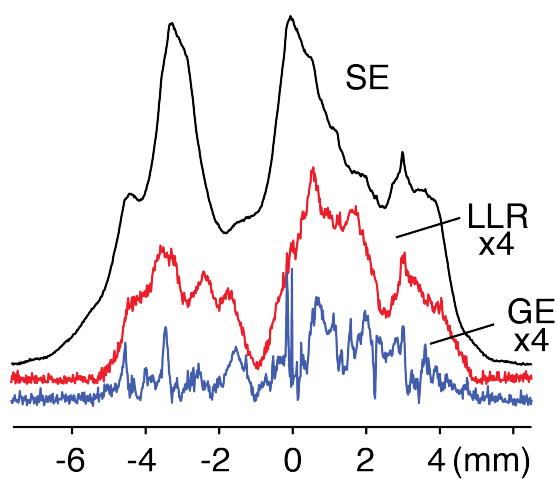

**Fig. S3.** One-dimensional images of a trabecular bone sample with conventional spin echo (SE) (black), LLR (red) and conventional gradient echo (GE) (blue).

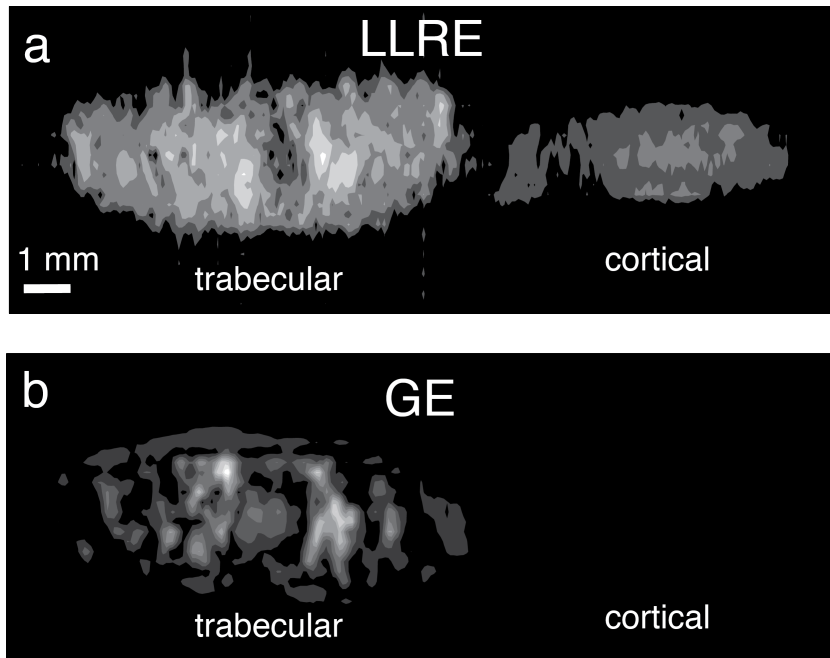

**Fig. S4.** Two-dimensional images of a sample containing a piece of cortical and trabecular bone. (a) LLRE and (b) conventional GE. Resolution:  $77 \times 226 \mu\text{m}^2$ .
